# Supplementary figures and images for: Agave Leaves as a Substrate for the Production of Cellulases by Penicillium sp. and the Obtainment of Reducing Sugars
Source: Hindawi journal article supplement (doi:10.1155/2020/6092165), 2020-04-24

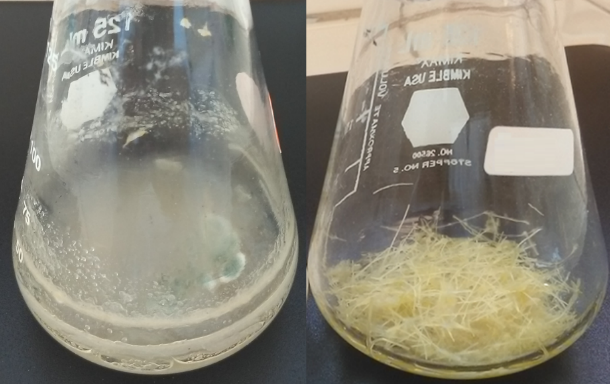


**Figure 1** Growth of *Penicillium* sp. on parenchyma (left) and fibers (right).

Supplement: f1 [file 6092165.f1.docx]
